# Supplementary material for: A Porous Reservoir-Backed Boronate Gel Microneedle for Efficient Skin Penetration and Sustained Glucose-Responsive Insulin Delivery
Source: MDPI journal article supplement (doi:10.3390/gels8020074), 2022-01-24
Supplement: s1 [file s1]

Supplementary

# A Porous Reservoir-Backed Boronate Gel Microneedle for Efficient Skin Penetration and Sustained Glucose-Responsive Insulin Delivery

Siyuan Chen <sup>1</sup>, Takuya Miyazaki <sup>2,3</sup>, Michiko Itoh <sup>2,3</sup>, Hiroko Matsumoto <sup>2,3</sup>, Yuki Moro-oka <sup>2</sup>, Miyako Tanaka <sup>4</sup>, Yuji Miyahara <sup>2</sup>, Takayoshi Suganami <sup>4</sup> and Akira Matsumoto <sup>2,3,\*</sup>

<sup>1</sup> Research Institute for Biomaterials, Tech Institute for Advanced Materials, College of Materials Science and Engineering, Suqian Advanced Materials Industry Technology Innovation Center, NJTech-BARTY Joint Research Center for Innovative Medical Technology, Nanjing Tech University, Nanjing, 212000, China; siyuan.chen@njtech.edu.cn

<sup>2</sup> Institute of Biomaterials and Bioengineering, Tokyo Medical and Dental University, Tokyo, 101-0062, Japan; miyazaki.bsr@tmd.ac.jp (T.M.); mito.mem@tmd.ac.jp (M.I.); hiroko.matsumoto.bsr@tmd.ac.jp (H.M.); morooka.bsr@tmd.ac.jp (Yuki Moro-oka); miyahara.bsr@tmd.ac.jp (Yuji Miyahara)

<sup>3</sup> Kanagawa Institute of Industrial Science and Technology, Ebina, 213-0012, Japan

<sup>4</sup> Department of Molecular Medicine and Metabolism, Research Institute of Environmental Medicine, Nagoya University, Nagoya, 464-8601, Japan; tanaka@riem.nagoya-u.ac.jp (M.T.); suganami@riem.nagoya-u.ac.jp (T.S.)

\* Correspondence: matsumoto.bsr@tmd.ac.jp

**Citation:** Chen, S.; Miyazaki, T.; Itoh, M.; Matsumoto, H.; Moro-oka, Y.; Tanaka, M.; Miyahara, Y.; Suganami, T.; Matsumoto, A. A Porous Reservoir-Backed Boronate Gel Microneedle for Efficient Skin Penetration and Sustained Glucose-Responsive Insulin Delivery. *Gels* **2022**, *8*, 74.

<https://doi.org/10.3390/gels8020074>

Academic Editor: Damien Dupin

Received: 8 December 2021

Accepted: 10 January 2022

Published: 24 January 2022

**Publisher's Note:** MDPI stays neutral with regard to jurisdictional claims in published maps and institutional affiliations.

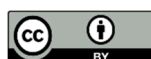

**Copyright:** © 2022 by the authors. Submitted for possible open access publication under the terms and conditions of the Creative Commons Attribution (CC BY) license (<https://creativecommons.org/licenses/by/4.0/>).

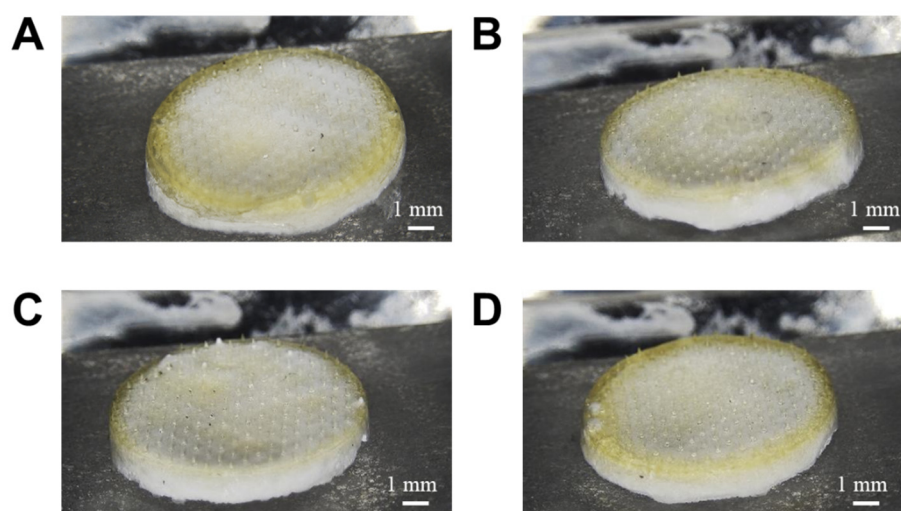

**Figure S1.** The appearance of the type 3 MNs with “cake-like” structure (A) without PVA coating, (B) coated with PVA and heated once, (C) coated with PVA and heated twice and (D) coated with PVA and heated three times.

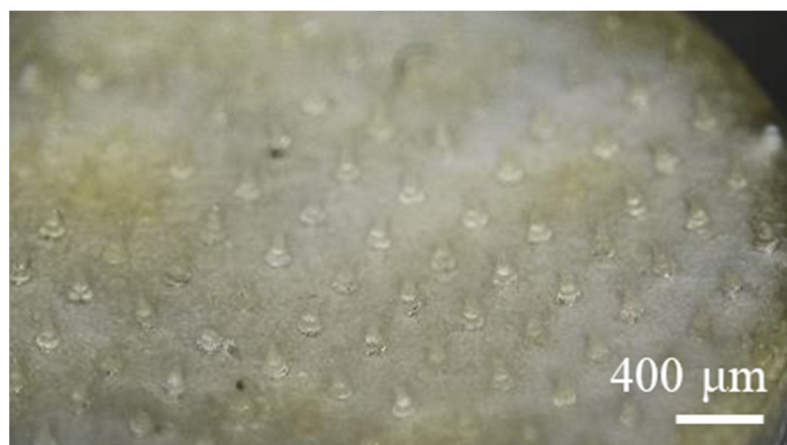

**Figure S2.** The appearance of the type 3 MNs with a “cake-like” structure after skin insertion.

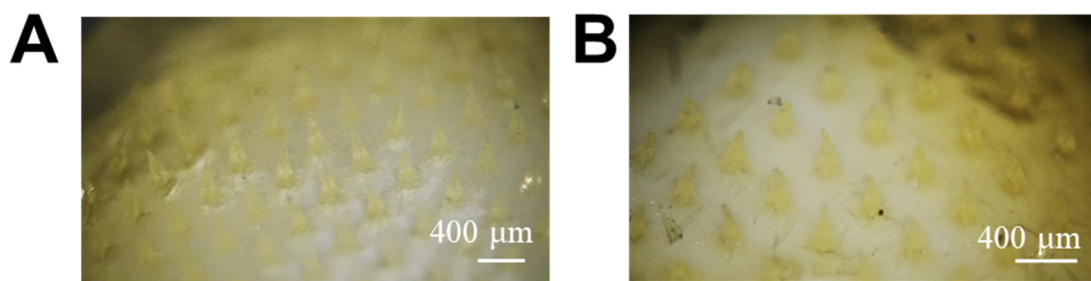

**Figure S3.** The appearance of the type 3 MNs with “cake-like” structure (A) before and (B) after HPLC experiment.
